# Supplementary material for: Unconventional aliphatic fluorophores discovered as the luminescence origin in citric acid–urea carbon dots
Source: Royal Society of Chemistry journal article supplement (doi:10.1039/d2nr02361j), 2022-01-01
Supplement: d2nr02361j5.pdf [file d2nr02361j5.pdf]

## Unconventional aliphatic fluorophores discovered as the luminescence origin in citric acid-urea carbon dots

Xiaoxiao Yao,<sup>1</sup> Yinhan Wang,<sup>4</sup> Fangjia Li,<sup>5</sup> Joseph J. Dalluge,<sup>1</sup> Galya Orr,<sup>5</sup> Rigoberto Hernandez,<sup>4</sup> Qiang Cui,<sup>2,3</sup> and Christy L. Haynes<sup>1\*</sup>

<sup>1</sup> Department of Chemistry, University of Minnesota-Twin Cities, 207 Pleasant Street SE, Minneapolis, Minnesota 55455, United States

<sup>2</sup> Department of Chemistry, Boston University, 590 Commonwealth Avenue, Boston, Massachusetts 02215, United States

<sup>3</sup> Departments of Physics and Biomedical Engineering, Boston University, 590 Commonwealth Avenue, Boston, Massachusetts 02215, United States

<sup>4</sup> Departments of Chemistry, Chemical and Biomolecular Engineering, and Materials Science and Engineering, Johns Hopkins University, Baltimore, Maryland 21218, United States

<sup>5</sup> Environmental Molecular Sciences Laboratory, Pacific Northwest National Laboratory, Richland, Washington 99354, United States

\*Corresponding author: [chaynes@umn.edu](mailto:chaynes@umn.edu)

### Materials and Methods

Materials: Citric acid (Sigma-Aldrich, ≥99.5%) and urea (Mallinckrodt, ≥99.6%) were purchased and used without further purification. Milli-Q water was from Direct-Q® 3, 5, 8 laboratory water purification system by MilliporeSigma. 5-oxopyrrolidine-3-carboxylic acid (Combi-Blocks, 97%), 5-oxopyrrolidine-3-carboxamide (Ambeed, 97%), ethyl 5-oxopyrrolidine-3-carboxylate (Millipore Sigma, 95%), and N-ethyl 5-oxopyrrolidine-3-carboxylate (Chembridge Corporation, 95%) were purchased and used without further purification.

ESI-MS/MS method: A Sciex ExionLC UHPLC system coupled to a Sciex X500R quadrupole-time-of-flight mass spectrometer (UHPLC/QTOF-MS) was used for separation, detection, and structural characterization of 5-oxopyrrolidine-3-carboxylic acid separated from CD synthesis. A Phenomenex Kinetix (2.6 μm) F5 (100 Å), 2.1 mm x 30 mm column at 40 °C was used during the following 5 min gradient rapid elution with A: Water containing 0.1% formic acid and B: Methanol containing 0.1% formic

acid, at a flow rate of 0.5 mL/min: 5% B, 0 min to 1.0 min; 5% B to 50% B, 1.0 min to 2.0 min; 50% B to 95% B, 2.0 min to 3.0 min; 95% B, 3.0 min to 3.5 min; 95% B to 5% B, 3.5 min to 4.0 min; 5% B 4.0 min to 5.0 min. For electrospray ionization mass spectrometry in positive ionization mode (5 min), parameters were as follows: scan time, 0.127s; ion source gas1, 45; ion source gas2, 45; curtain gas, 30; CAD gas, 7; temperature 500 °C; spray voltage, 5500 V; declustering potential (DP), 50; DP spread, 0; scan range,  $m/z$  50-500; accumulation time, 0.1 s; collision energy, 10; collision energy spread, 0. For electrospray ionization tandem mass spectrometry (ESI-MS/MS) in positive ionization mode, parameters were as follows: scan time, 0.102 s; ion source gas1, 45; ion source gas2, 45; curtain gas, 30; CAD gas, 7; temperature 500 °C; spray voltage, 5500 V; declustering potential (DP), 50; DP spread, 0; scan range,  $m/z$  50-1200; accumulation time, 0.1 s; collision energy, 35; collision energy spread, 15.

Sample preparation for single molecule imaging: 5-oxopyrrolidine-3-carboxylic acid solid powder (Catalog No. CA-5625, combi-blocks) was dissolved in distilled water at a concentration of 0.8  $\mu\text{g/ml}$ . Solutions were sonicated in ice water using Misonix Sonicator 3000, operated at 10 W for 4 $\times$ 2.5 min. The solution was diluted 10 times, and a 10  $\mu\text{l}$  drop was spin-coated on a coverslip at the bottom of a cell culture dish.

Single molecule fluorescence microscopy: Imaging was performed using Olympus IX-71 inverted microscope with a 100 $\times$  oil immersion objective, four solid-state lasers (405, 488, 542, 594) with similar power, and an Electron Multiplying CCD camera (Andor iXon Ultra 897). The camera's pixel size was 16  $\mu\text{m}$  and the microscope magnification was 100X. Thus, the scale factor was 160 nm/pixel. 1,000 images of 512 $\times$ 512 pixels were collected within 100 s and stored as 16-bit FITS files. The analysis was performed using MATLAB routines available upon request.

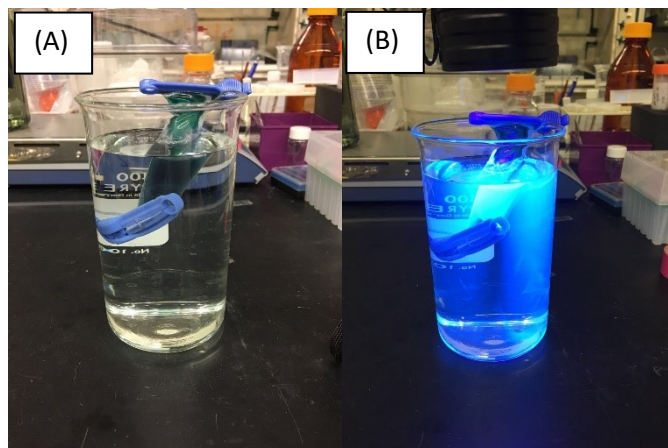

Figure S1. Carbon dots (CDs) undergoing dialysis under white light (A); and under 400 nm illumination (B).

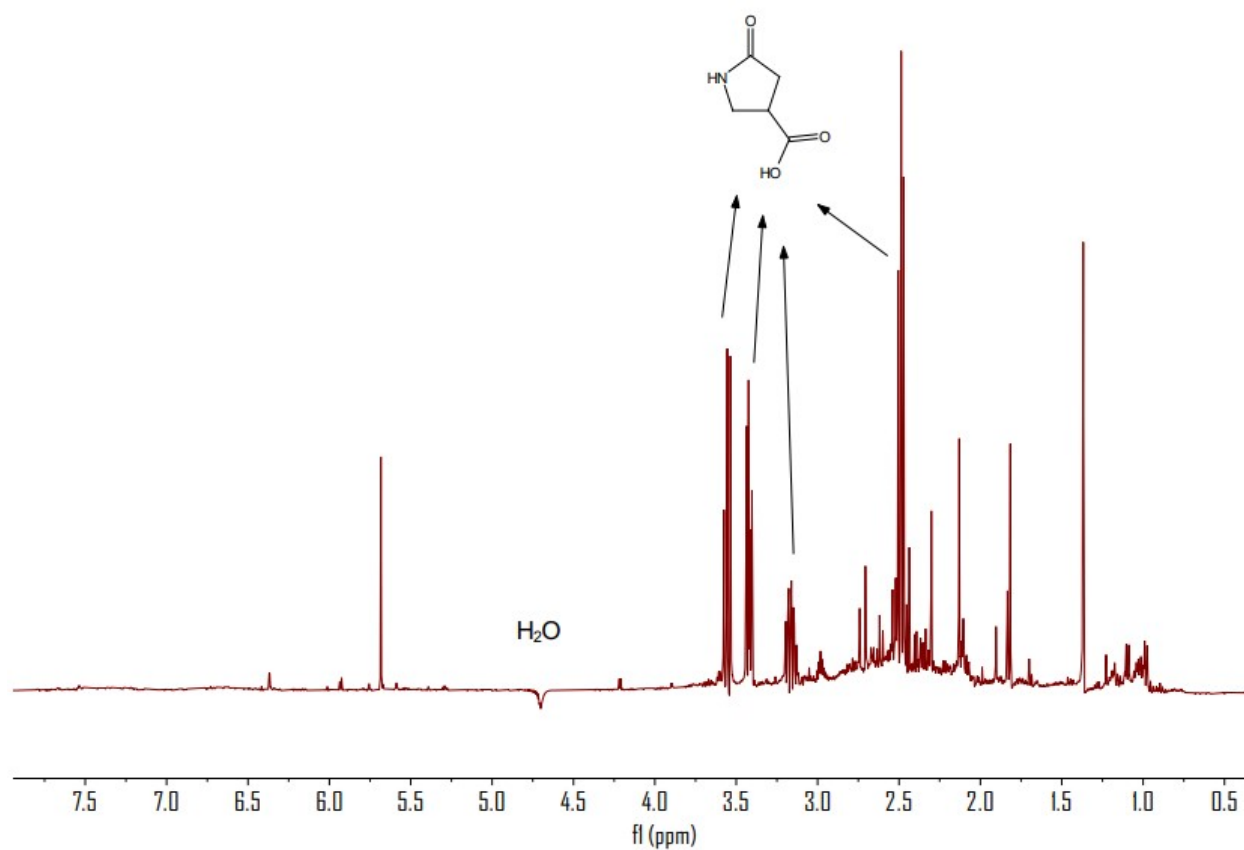

Figure S2.  $^1\text{H}$  NMR spectrum of CDs dialysate in 90%  $\text{H}_2\text{O}$ +10%  $\text{D}_2\text{O}$  in water suppression mode.

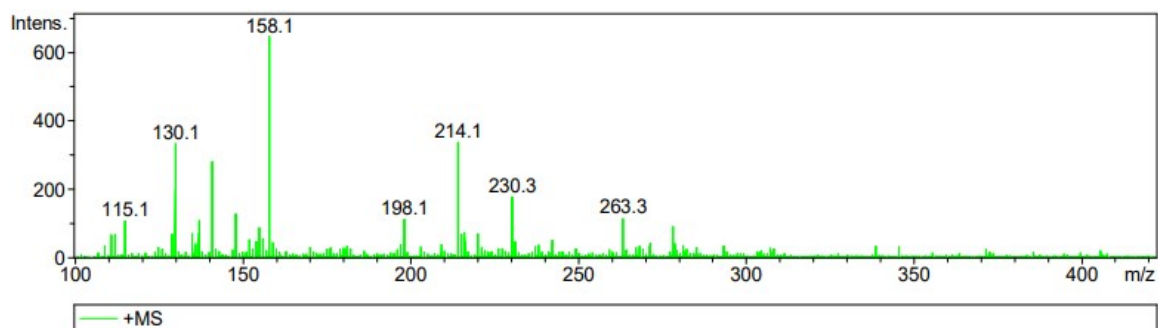

| #  | m/z   | I   |
|----|-------|-----|
| 1  | 115.1 | 107 |
| 2  | 130.1 | 333 |
| 3  | 135.1 | 71  |
| 4  | 137.1 | 109 |
| 5  | 141.0 | 280 |
| 6  | 148.1 | 128 |
| 7  | 155.1 | 88  |
| 8  | 156.1 | 54  |
| 9  | 158.1 | 645 |
| 10 | 198.1 | 113 |
| 11 | 214.1 | 336 |
| 12 | 230.3 | 177 |
| 13 | 263.3 | 114 |

Figure S3. ESI-MS spectrum of CDs dialysate in positive mode.

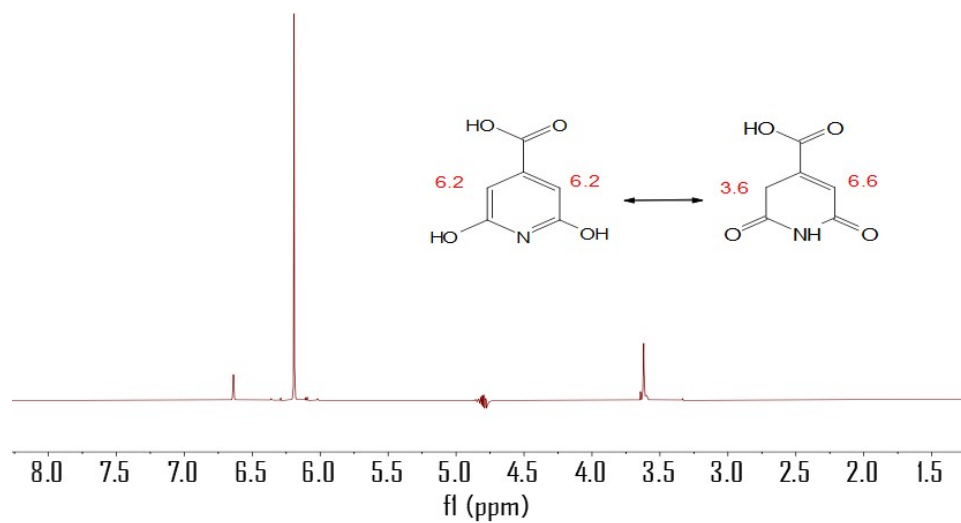

Figure S4.  $^1\text{H}$  NMR spectrum of citrazinic acid in 90%  $\text{H}_2\text{O}$ +10%  $\text{D}_2\text{O}$  in water suppression mode

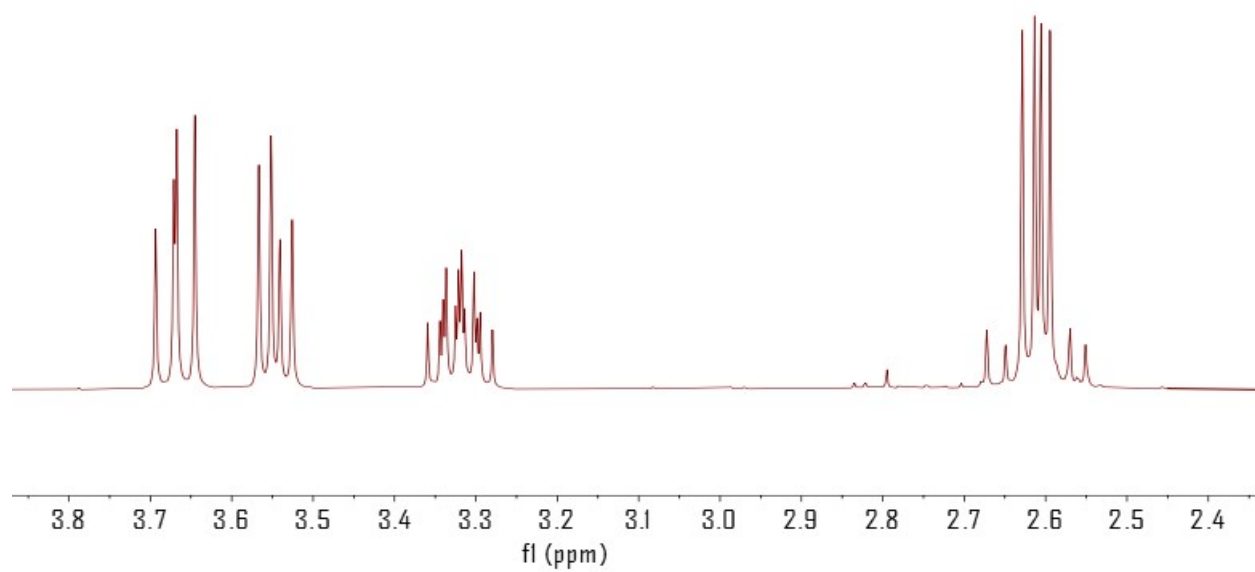

Figure S5.  $^1\text{H}$  NMR spectrum of **1** in  $\text{D}_2\text{O}$

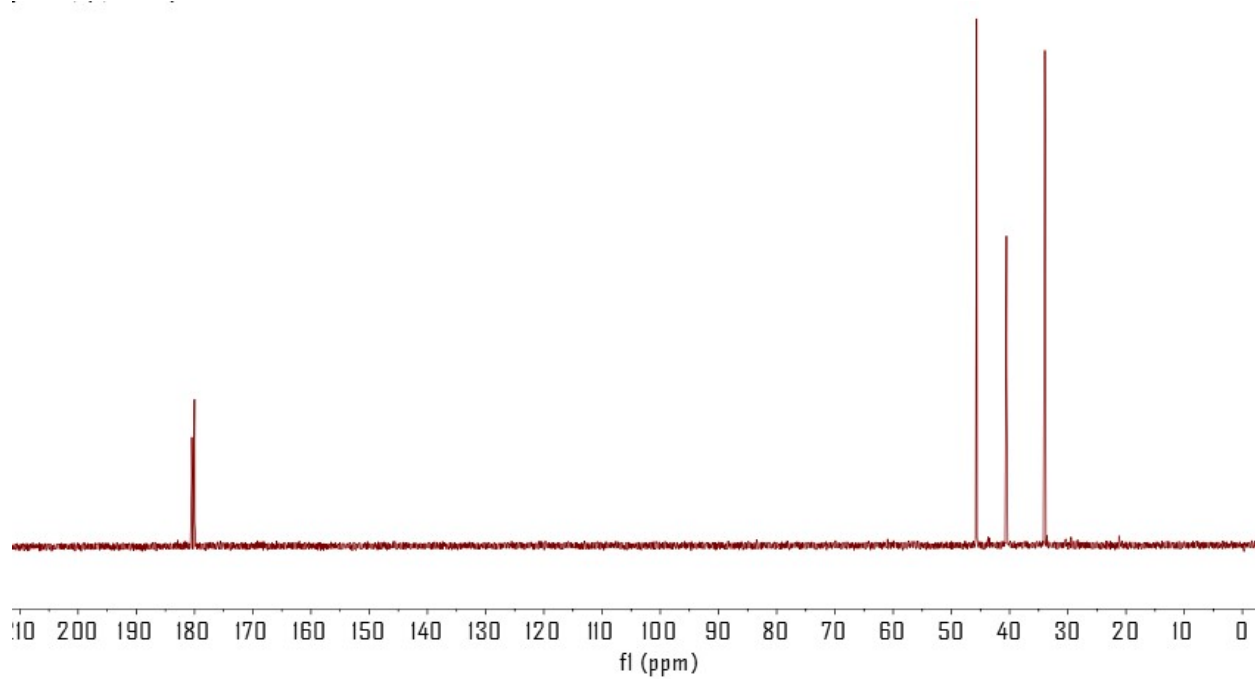

Figure S6.  $^{13}\text{C}$  CPT spectra of **1** in  $\text{D}_2\text{O}$

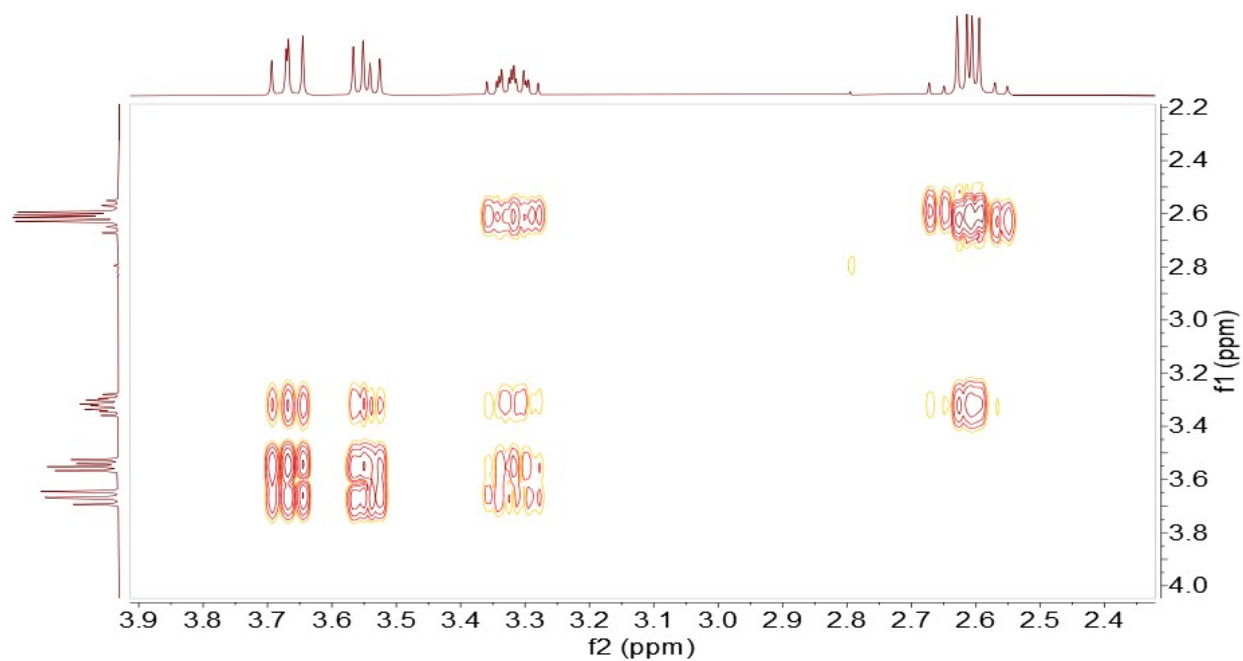

Figure S7.  $^1\text{H}$  COSY spectra of **1** in  $\text{D}_2\text{O}$

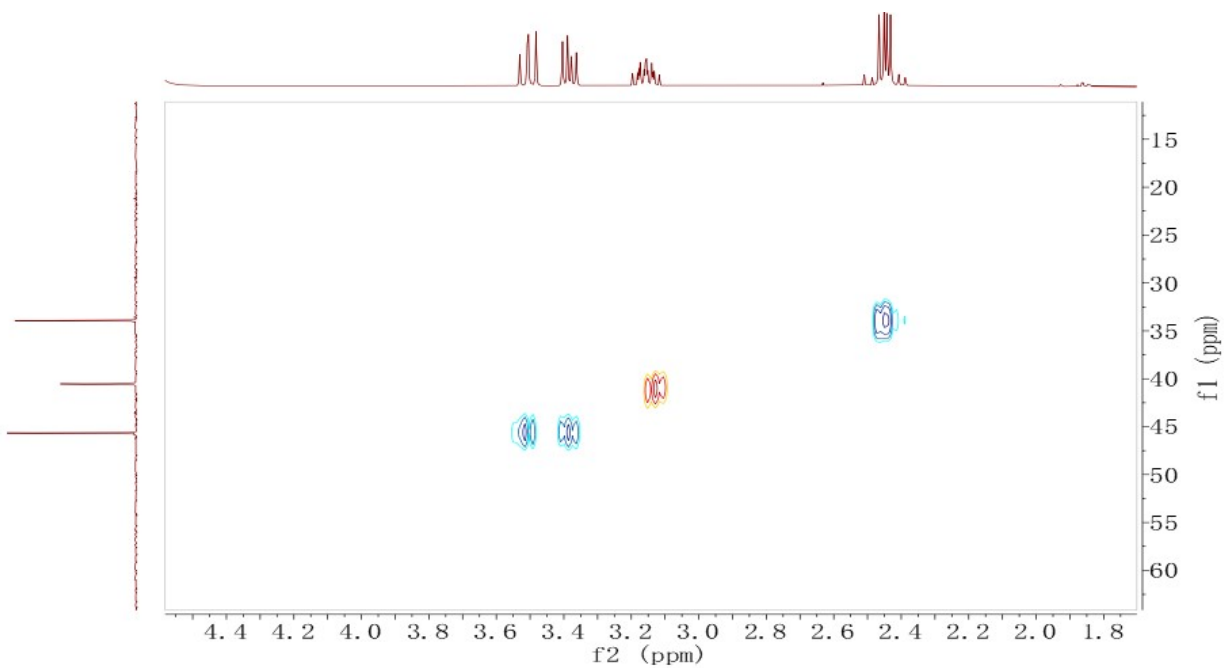

Figure S8.  $^1\text{H}$ - $^{13}\text{C}$  HSQC spectrum of **1** in  $\text{D}_2\text{O}$

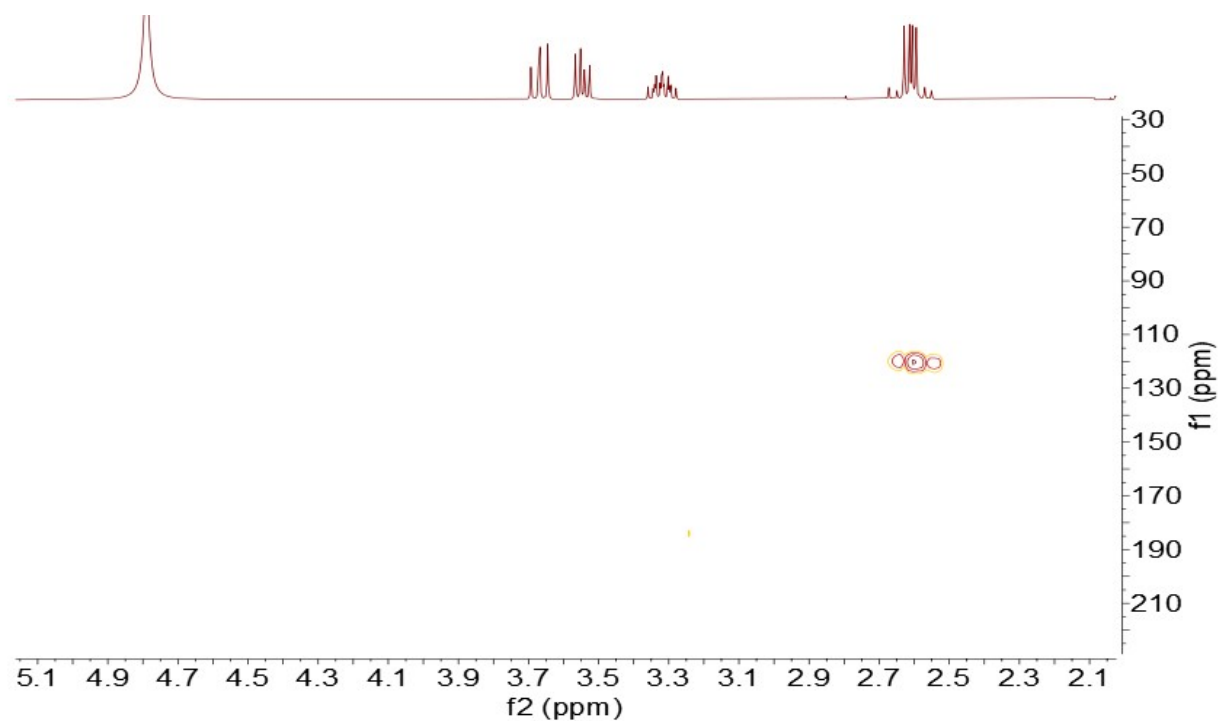

Figure S9.  $^1\text{H}$ - $^{15}\text{N}$  HMBC spectrum of **1** in  $\text{D}_2\text{O}$ .

Note: only two protons at 2.6 ppm showed coupling to the lactam nitrogen. This is probably due to the ring strain leading to other protons having  $J$  coupling constants that are outside of the detection range.

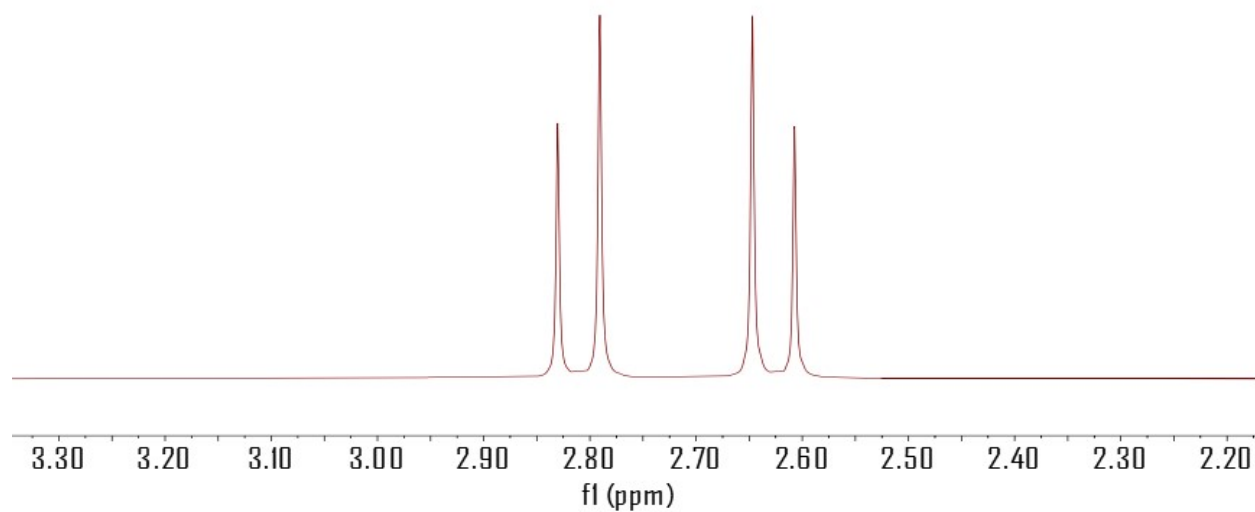

Figure S10.  $^1\text{H}$  NMR spectrum of citric acid.

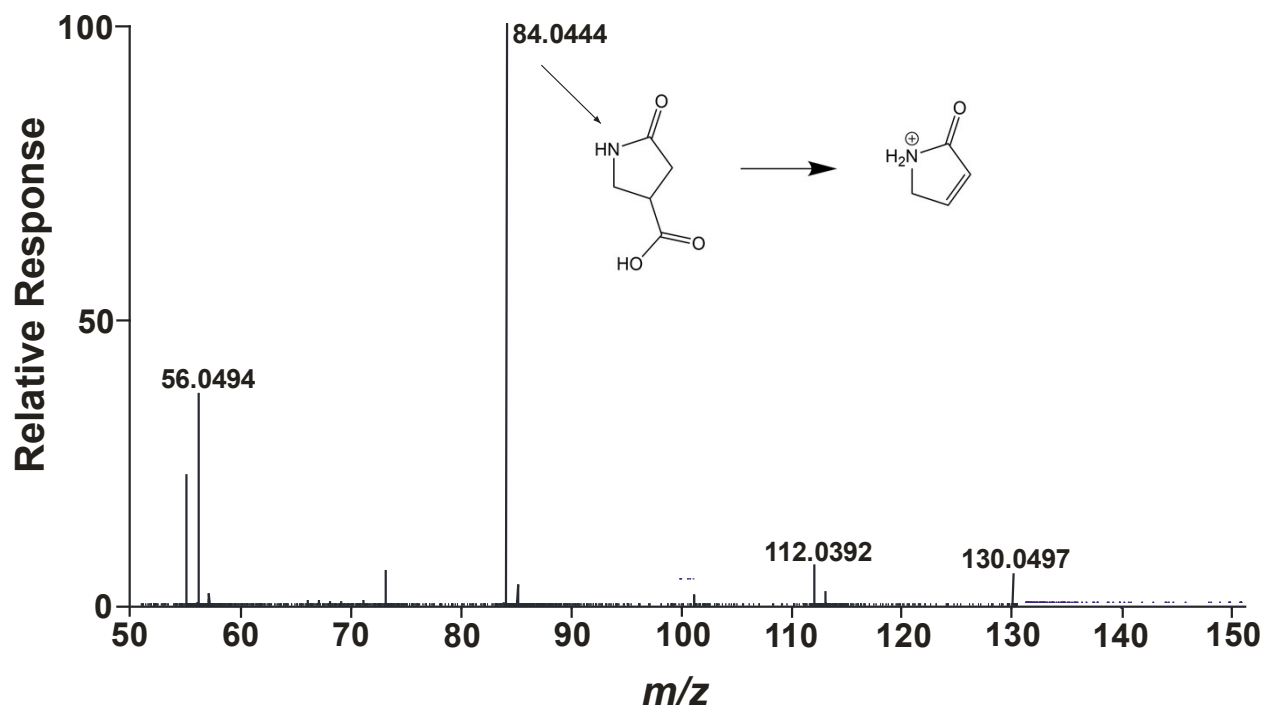

Figure S11. ESI-MS/MS spectrum of **1** separated from CD synthesis. The inserted scheme illustrates the proposed fragmentation of **1**.

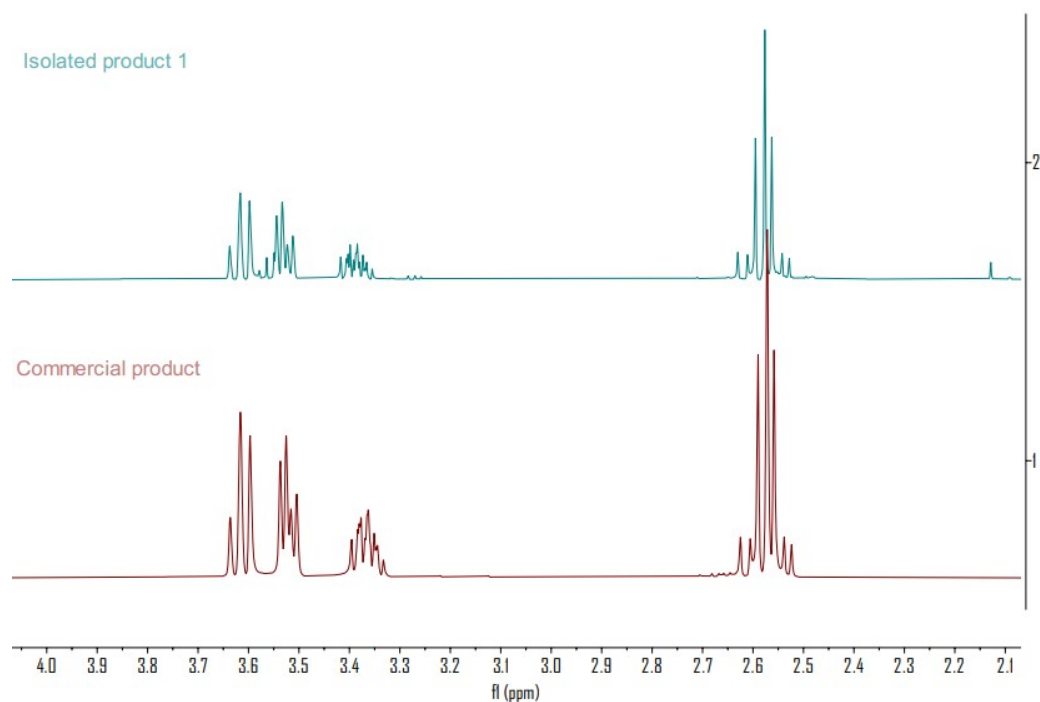

Figure S12. Stacked  $^1\text{H}$  NMR spectra of commercial product 5-oxopyrrolidine-3-carboxylic acid and the isolated product **1**.



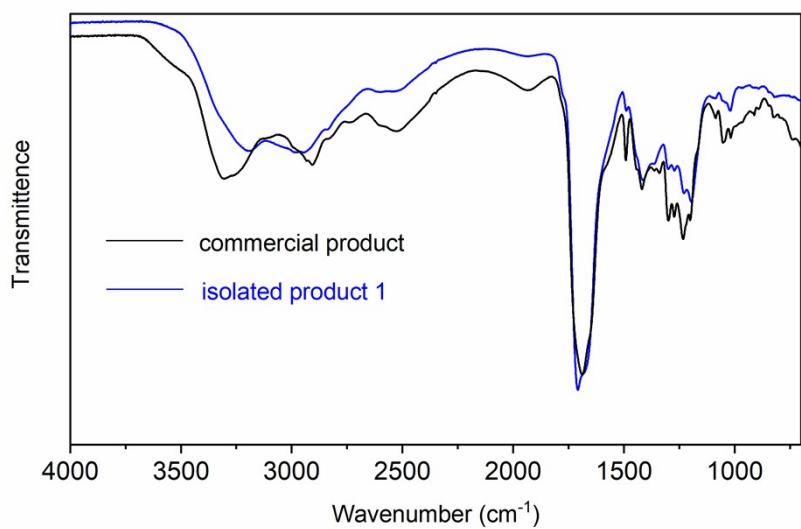

Figure S13. Stacked FT-IR spectra of commercial product 5-oxopyrrolidine-3-carboxylic acid and the isolated product **1**.

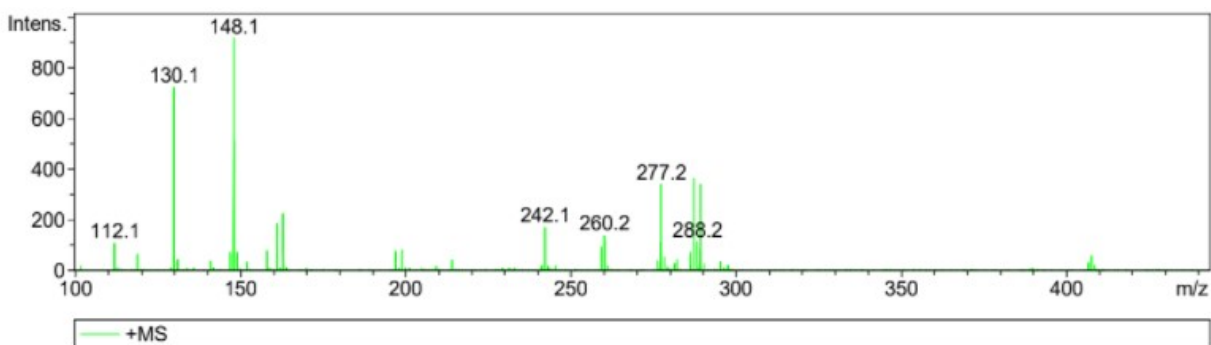

| # | $m/z$ | I   |
|---|-------|-----|
| 1 | 112.1 | 108 |
| 2 | 130.1 | 720 |
| 3 | 148.1 | 916 |
| 4 | 242.1 | 170 |
| 5 | 260.2 | 136 |
| 6 | 277.2 | 340 |
| 7 | 288.2 | 112 |

Figure S14. Positive mode ESI-MS of the raw product from itaconic acid and urea reaction.

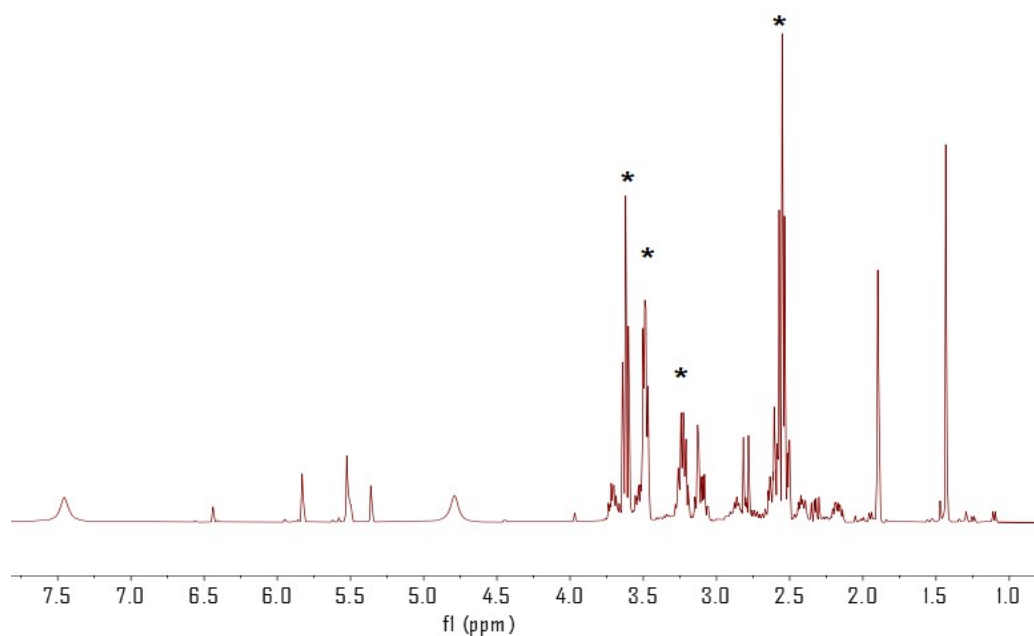

Figure S15.  $^1\text{H}$  NMR of the raw product from itaconic acid and urea reaction, with \* indicating the formation of 5-oxopyrrolidine-3-carboxylic acid.

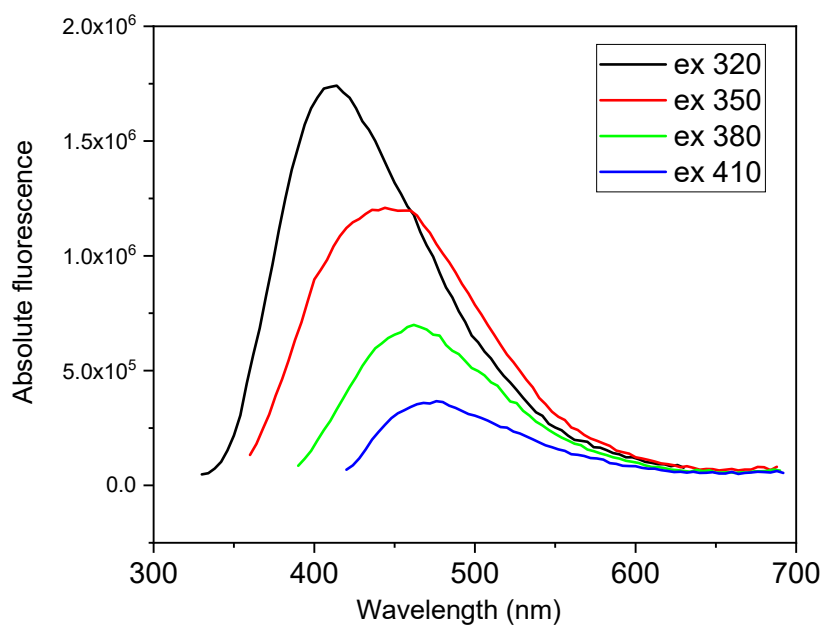

Figure S16. The fluorescence spectra of the raw product of the hydrothermal reaction between itaconic acid and urea with varied excitation wavelength.

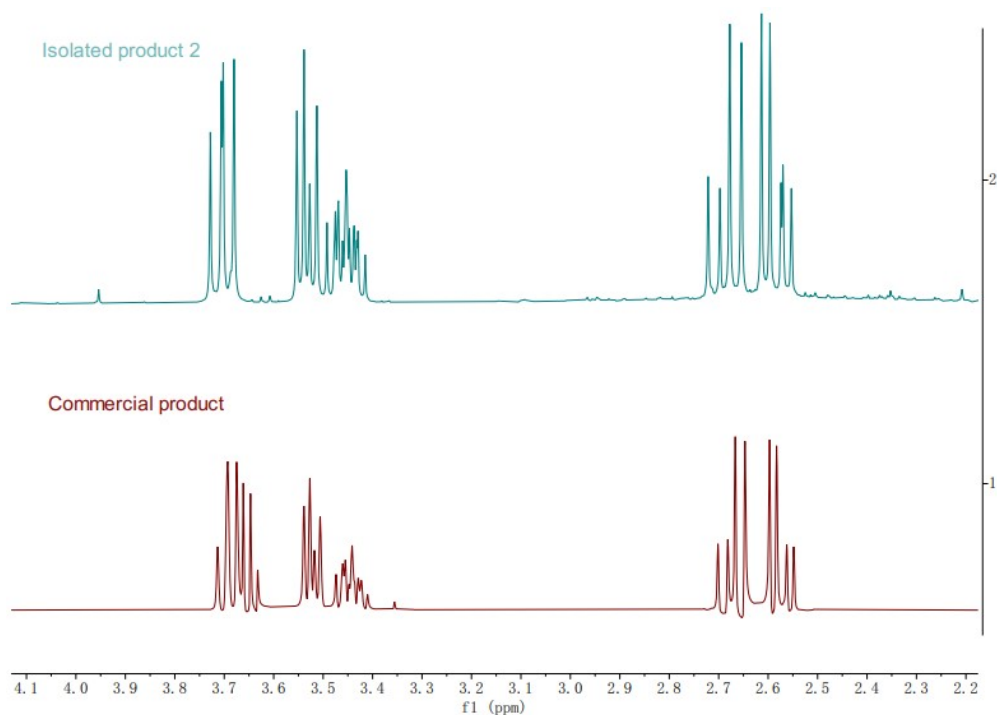

Figure S17. Stacked  $^1\text{H}$  NMR spectra of commercial product 5-oxopyrrolidine-3-carboxamide and the isolated product **2**.

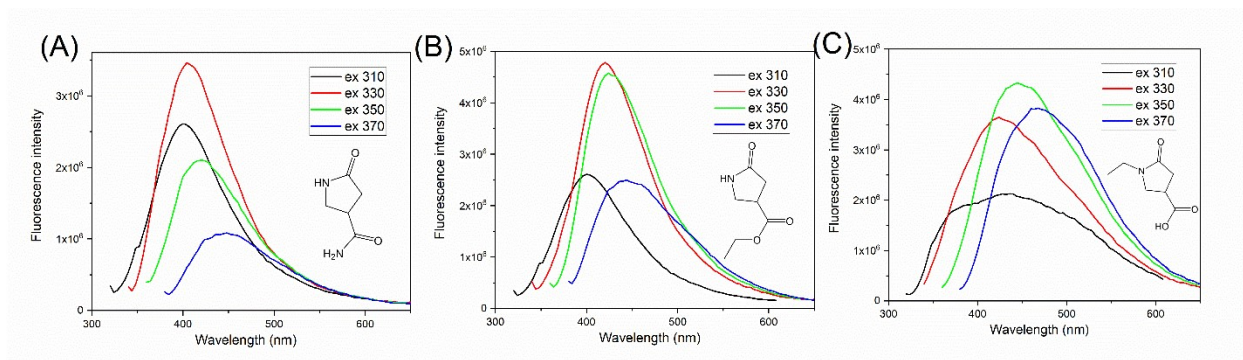

Figure S18. Fluorescence spectra of 5-oxopyrrolidine-3-carboxamide (A); ethyl-5-oxopyrrolidine-3-carboxylate (B); and N-ethyl-5-oxopyrrolidine-3-carboxylic acid (C) with varied excitation wavelength.

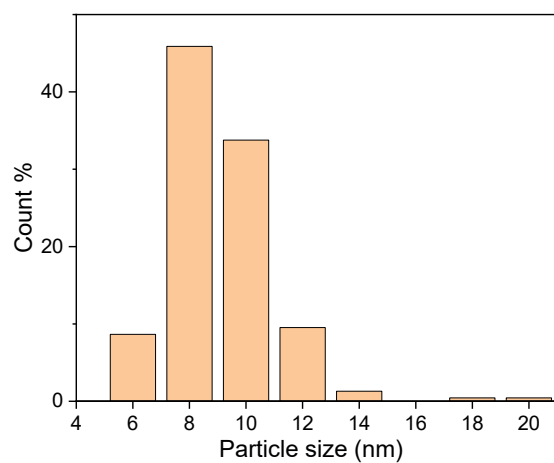

Figure S19. TEM particle size distribution histogram of CDs (n=231) using ImageJ analysis tools.

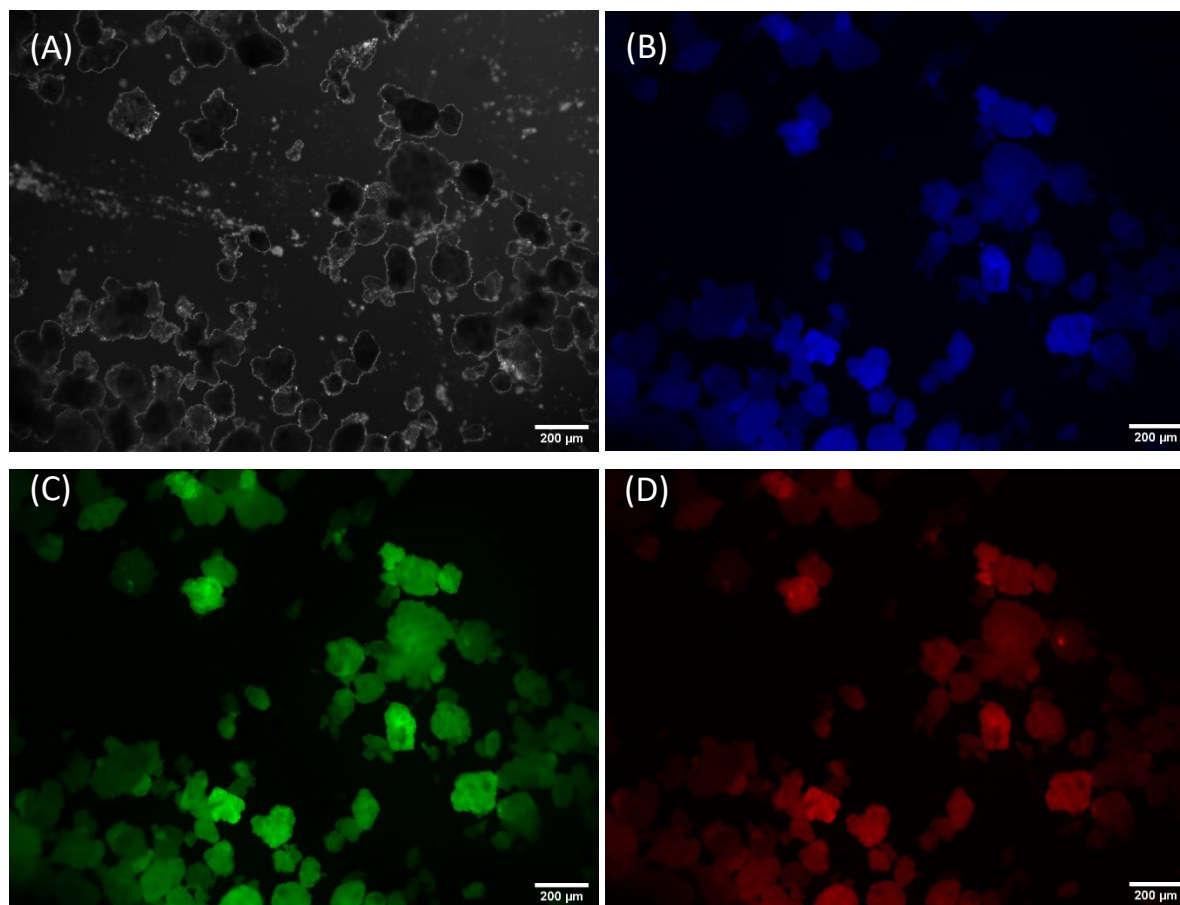

Figure S20. Macroscopic fluorescent images of solid **1** particles in bright field with differential interference contrast (A); DAPI channel, excitation 360-380 nm; emission 415 nm with longpass filter (B);

GFP channel, excitation 450-490 nm; emission 500-550 nm(C); and RFP channel, excitation 510-555 nm, emission 575-595 nm (D).

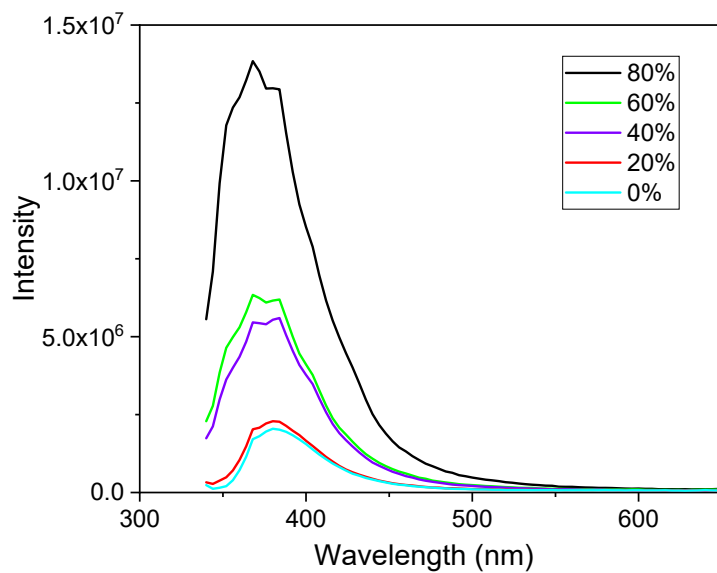

Figure S21. Fluorescence spectra of **2** in mixed solvents of DMSO and THF, with the percentage indicating the THF%.

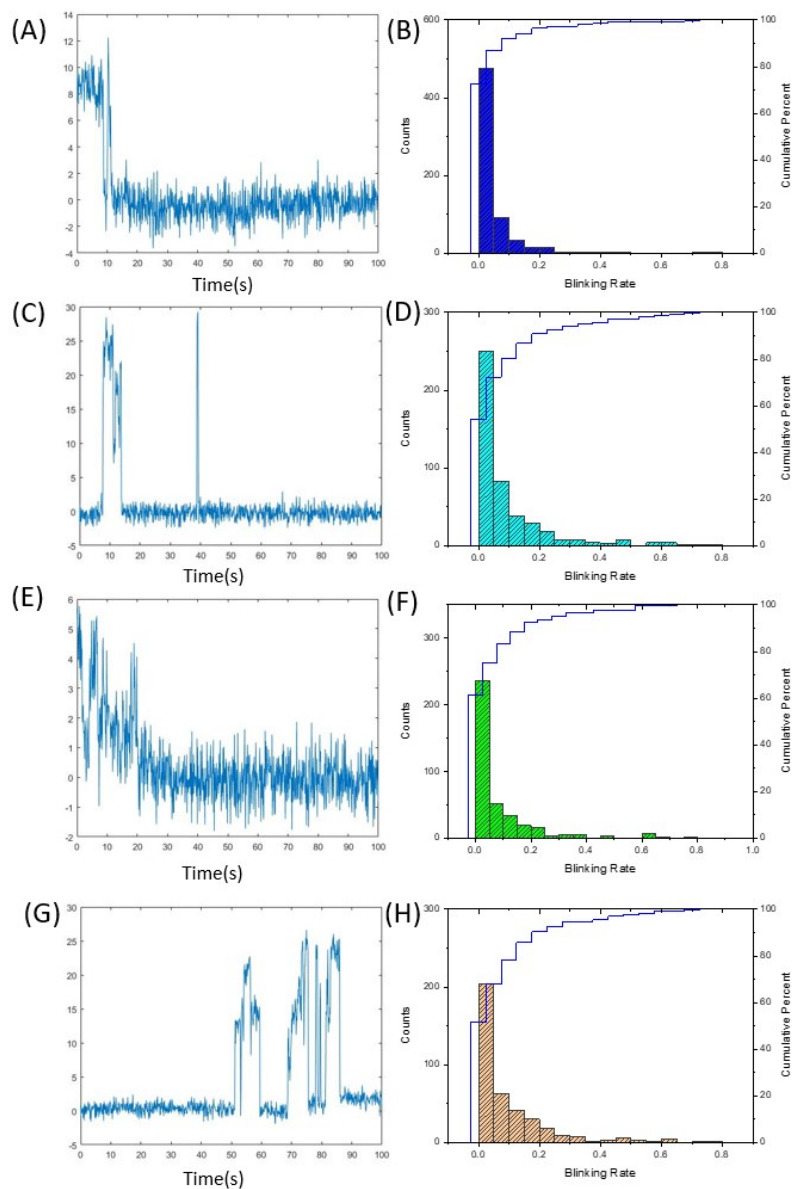

Figure S22. Characterization of on-time fraction for 5-oxopyrrolidine-3-carboxylic acid. Representative fluorescence traces from a single molecule on a glass coverslip in a culture dish excited by 405-nm, 488-nm, 542-nm, or 594-nm wavelengths are shown in (A), (C), (E), and (G), respectively. The histograms and cumulative percentages of the single molecule on-time fractions were calculated under excitation of 405-nm from 653 molecules (B), under 488-nm from 461 molecules (D), under 542-nm from 384 molecules (F), and under 594-nm from 394 molecules (H).

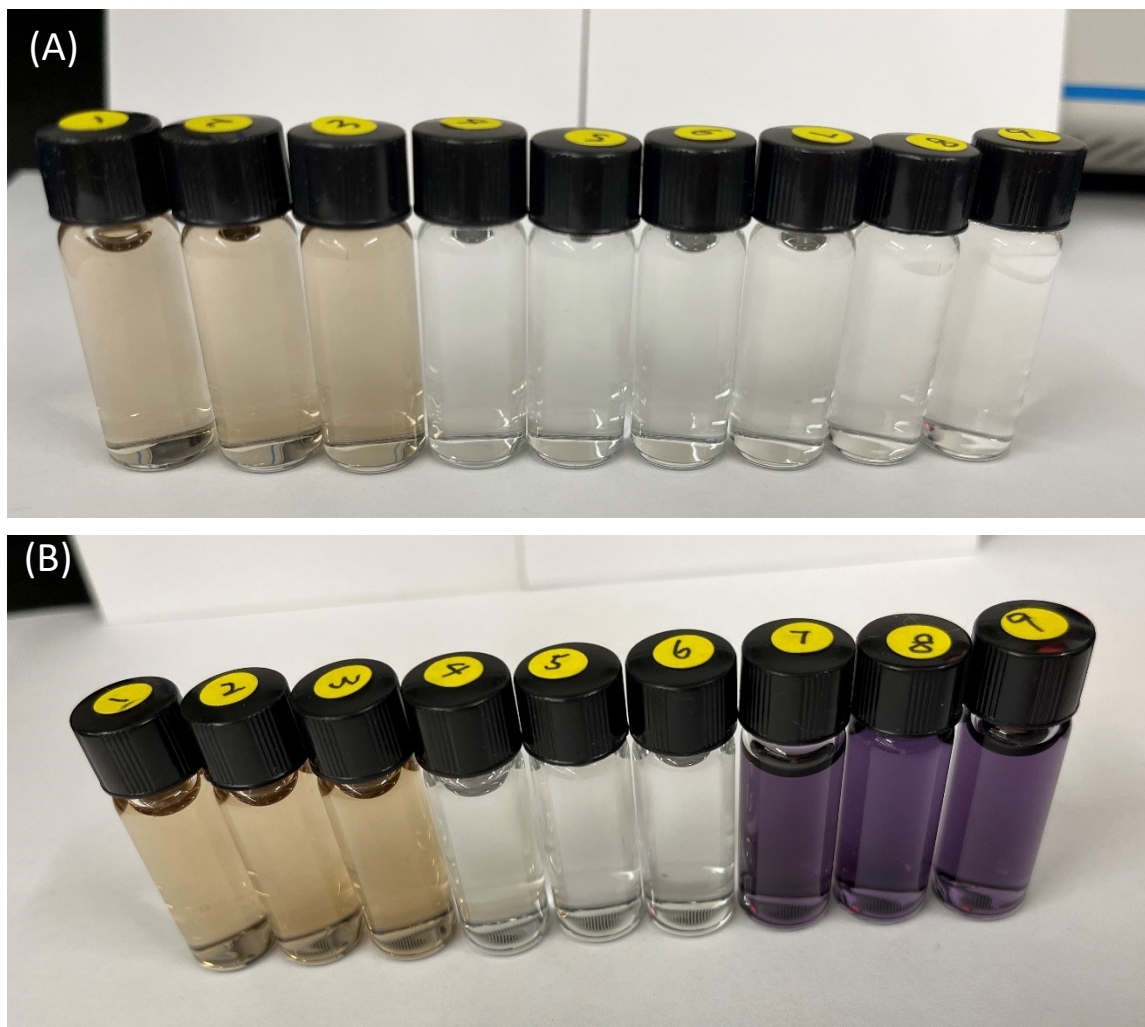

Figure S23. Photos of samples at the start of the room temperature stability test (A) and at the end (B). Bottles labeled 1-3 are replicate CDs; 4-6 are replicate 5-oxopyrrolidine-3-carboxylic acid; 7-9 are replicate citrazinic acid.

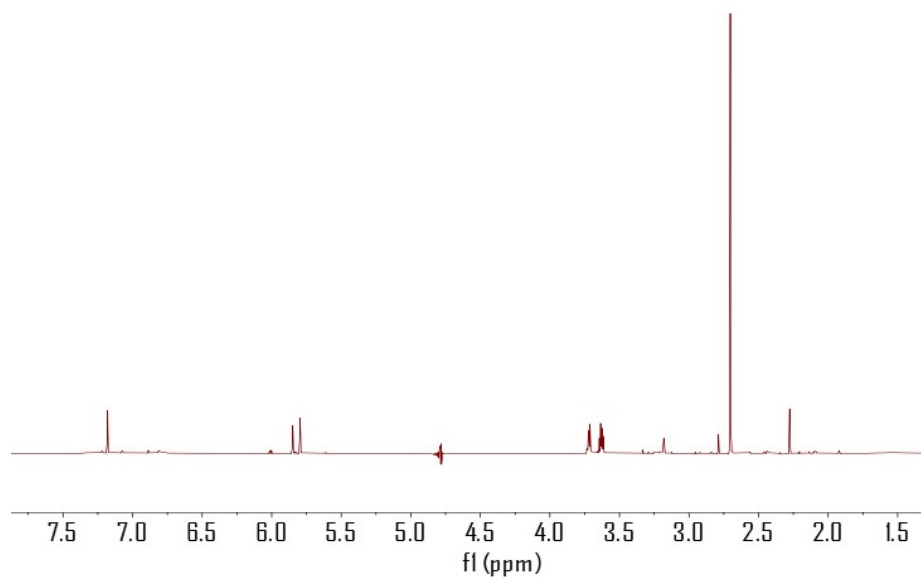

Figure S24.  $^1\text{H}$  NMR spectra of citrazinic acid after dispersing in water for 7 days.

Table S1. Other fluorophores generated in CD synthesis.

| Fluorophore number | Emission color                   | m/z in ESI-MS      | $^1\text{H}$ NMR chemical shift    |
|--------------------|----------------------------------|--------------------|------------------------------------|
| 3                  | other blue fluorophores          | 156, 179, 217      | Singlet 8.3 ppm                    |
| 4                  | green                            | 236                |                                    |
| 5                  | yellow                           | 161, 163           | 1.8 ppm; 2.3 ppm, 2.7 ppm, 5.9 ppm |
| 6                  | red                              | 220                | 2.0 ppm                            |
| 7 dark substances  | little blue/cyan or no emissions | 141, 135, 158, 214 | 4.3 ppm, 3.7 ppm, 1.2 ppm          |
